# Supplementary material for: Perceived fear and exercise difficulty in patients with migraine and their association with psychosocial factors: a cross-sectional study
Source: PeerJ. 2025 May 12;13:e19342. doi: 10.7717/peerj.19342 (PMC12085118; doi:10.7717/peerj.19342)
Supplement: Supplemental Information 5 — All participants’ data collected with the online questionnaire, including questionnaire scores and exercise fear and difficulty scores. [file peerj-13-19342-s005.xlsx]

## Sheet: Hoja1
ID	Dx_1	Dx_2	Age	Sex	Academic_level	Employment_status	Height	Weight	BMI	Other_headache	Choi_1	Choi_2	Choi_3	Choi_4	Choi_5	Choi_6	Choi_7	Choi_8	Choi_Total	IPAQ_1	IPAQ_2	IPAQ_3	IPAQ_4	IPAQ_5	IPAQ_6	IPAQ_7	IPAQ_Vigorous	IPAQ_Moderate	IPAQ_Walking	IPAQ_Total	TSK_1	TSK_2	TSK_3	TSK_4	TSK_5	TSK_6	TSK_7	TSK_8	TSK_9	TSK_10	TSK_11	TSK_Total	PCS_1	PCS_2	PCS_3	PCS_4	PCS_5	PCS_6	PCS_7
1	Chronic	visual	47	F	Secondary	Active	160	51	19.9219	Tensional headache	1	1	1	1	1	1	1	1	8	3	30	5	50	7	90	250	720	1000	2079	3799	1	4	3	1	1	1	1	1	1	1	1	16	3	1	2	0	0	2	0
2	Chronic	visual/motor	21	F	College	Active, Unemployed	158	67	26.8386	No	1	1	1	0	1	1	1	1	7	0	0	0	0	6	60	600	0	0	1188	1188	4	4	4	4	4	4	4	4	3	3	4	42	3	4	4	4	4	4	4
3	Chronic	w/o	20	F	College	Student	166	48	17.4191	No	1	1	1	0	1	1	1	0	6	3	15	3	40	7	90	450	360	480	2079	2919	1	2	2	3	1	4	3	4	3	3	4	30	4	4	3	4	3	4	3
4	Episodic	visual	27	F	College	Unemployed	157	60	24.3418	No	1	1	1	0	1	1	1	1	7	0	0	0	0	3	30	720	0	0	297	297	3	3	2	2	3	3	3	4	3	3	3	32	3	3	2	2	1	2	2
5	Episodic	w/o	33	F	College	Active	170	62	21.4533	No	1	1	1	1	1	1	0	1	7	3	20	3	30	7	45	360	480	360	1039.5	1879.5	1	2	3	3	1	3	1	4	2	4	4	28	2	2	1	1	2	3	1
6	Chronic	visual/motor	28	F	College	Active	162	90	34.2936	Tensional headache	1	1	1	1	1	1	1	1	8	0	0	0	0	7	60	270	0	0	1386	1386	1	4	2	3	1	2	1	4	2	2	2	24	3	4	4	2	4	4	2
7	Chronic	visual/motor	27	F	College	Active	168	49	17.3611	No	1	1	1	1	1	1	1	1	8	2	30	2	30	7	25	520	480	240	577.5	1297.5	2	4	3	1	2	3	3	3	4	4	3	32	3	2	4	2	2	3	1
8	Episodic	w/o	40	F	College	Active	163	60	22.5827	Tensional headache	1	1	1	0	1	0	0	1	5	0	0	5	15	3	75	540	0	300	742.5	1042.5	1	1	1	1	1	3	1	3	1	1	1	15	0	0	1	1	1	2	0
9	Chronic	visual/motor	22	F	College	Active	163	60	22.5827	No	1	1	1	1	1	1	1	1	8	3	90	2	120	7	45	540	2160	960	1039.5	4159.5	3	1	1	1	1	1	1	3	1	1	2	16	0	2	0	1	1	2	0
10	Chronic	w/o	44	F	College	Active	166	65	23.5883	No	0	1	0	0	1	0	0	0	2	0	0	0	0	0	0	420	0	0	0	0	3	3	4	3	1	4	4	4	3	3	3	35	3	3	3	3	3	3	3
11	Episodic	w/o	31	F	College	Active	165	56	20.5693	No	1	1	1	1	1	1	1	1	8	0	0	0	0	7	30	600	0	0	693	693	3	2	3	2	2	2	1	3	1	1	3	23	1	1	1	1	1	2	0
12	Chronic	visual/motor	19	F	College	Active, Student	167	75	26.8923	No	1	1	1	0	1	1	1	1	7	2	50	4	60	7	120	360	800	960	2772	4532	2	3	1	2	3	3	2	3	1	1	2	23	2	1	2	1	2	3	0
13	Episodic	visual	25	F	College	Active	175	63	20.5714	No	0	0	0	0	0	0	0	0	0	3	90	0	0	7	120	210	2160	0	2772	4932	1	3	1	2	1	2	1	3	1	1	1	17	1	3	2	0	3	3	0
14	Chronic	w/o	26	F	College	Active	168	72	25.5102	No	1	1	1	1	1	1	0	0	6	4	20	1	30	7	180	240	640	120	4158	4918	2	1	2	1	1	1	2	1	1	1	1	14	1	1	1	1	1	1	0
15	Chronic	motor	24	F	College	Active	170	65	22.4913	No	1	1	1	0	1	0	0	0	4	2	15	2	75	7	90	660	240	600	2079	2919	1	4	4	2	1	3	2	3	1	2	2	25	3	3	3	1	2	4	0
16	Episodic	visual/motor	25	F	College	Active	163	72	27.0993	Tensional headache	1	1	1	0	1	1	1	0	6	3	60	0	0	5	45	540	1440	0	742.5	2182.5	3	4	4	3	3	4	4	3	3	3	4	38	3	1	2	2	2	4	3
17	Chronic	visual/motor	24	F	College	Active	165	68	24.977	No	0	0	0	0	0	0	0	0	0	2	60	0	0	7	45	240	960	0	1039.5	1999.5	1	4	4	2	1	1	1	3	1	1	1	20	1	0	1	0	0	1	1
18	Episodic	visual/motor	27	F	College	Active	167	59	21.1553	No	1	0	0	0	1	0	0	0	2	3	45	2	50	7	50	120	1080	400	1155	2635	1	1	3	1	1	1	1	1	1	1	1	13	1	0	0	0	0	0	0
19	Episodic	w/o	26	F	College	Active, Student	170	56	19.3772	No	1	1	1	1	1	1	1	0	7	2	30	3	30	5	50	540	480	360	825	1665	1	4	2	1	1	2	1	3	1	1	1	18	1	2	1	2	1	2	1
20	Chronic	visual/motor	32	F	College	Active	169	59	20.6575	No	1	1	1	1	1	1	1	1	8	3	90	2	60	7	20	180	2160	480	462	3102	1	4	1	1	1	1	1	3	1	1	1	16	3	2	2	1	2	0	0
21	Chronic	visual/motor	39	F	College	Active	163	70	26.3465	Tensional headache	1	1	1	1	1	1	1	1	8	4	30	0	0	7	30	480	960	0	693	1653	1	4	3	2	1	3	1	4	1	4	2	26	4	4	4	4	4	4	3
22	Chronic	visual	21	F	Secondary	Student	160	56	21.875	No	1	1	1	1	1	1	0	0	6	4	120	1	60	7	180	180	3840	240	4158	8238	1	3	2	1	1	2	1	1	1	1	1	15	2	1	0	0	0	1	0
23	Episodic	visual/motor	46	F	College	Active	169	66	23.1084	No	1	1	1	1	1	1	0	0	6	5	20	5	20	7	25	300	800	400	577.5	1777.5	3	3	3	4	1	2	4	4	1	1	2	28	1	0	1	1	1	3	0
24	Episodic	visual/motor	42	F	College	Active, Student	165	78	28.6501	Tensional headache	1	1	1	0	1	1	1	0	6	4	40	2	20	5	15	600	1280	160	247.5	1687.5	1	4	1	1	1	1	1	1	1	1	1	14	0	1	0	0	1	0	0
25	Chronic	visual/motor	50	F	College	Active	160	70	66.4062	No	1	1	1	0	1	1	0	1	6	3	45	3	15	5	60	35	1080	180	990	2250	3	4	3	3	2	3	3	3	1	3	2	30	2	1	1	1	2	3	2
26	Chronic	visual/motor	42	F	College	Active	165	67	24.6097	No	1	1	1	1	1	1	0	1	7	3	20	3	40	5	120	240	480	480	1980	2940	4	4	3	2	4	4	2	3	4	4	4	38	2	1	1	0	0	1	0
27	Episodic	w/o	27	F	College	Student	176	65	20.984	No	1	1	1	0	1	1	0	0	5	2	60	0	0	0	0	720	960	0	0	960	3	2	2	3	3	3	3	2	3	4	2	30	2	1	1	1	1	2	2
28	Episodic	w/o	21	F	Secondary	Unemployed	163	70	26.3465	No	1	1	1	1	1	1	0	0	6	0	0	0	0	3	10	240	0	0	99	99	4	3	4	3	3	3	3	3	4	3	4	37	2	2	2	2	2	3	3
29	Chronic	motor	55	F	College	Active	156	80	32.8731	Tensional headache	1	1	1	1	1	1	0	0	6	0	0	0	0	5	30	120	0	0	495	495	3	3	4	3	3	4	3	3	3	3	4	36	0	2	2	2	2	2	0
30	Chronic	visual	21	F	College	Active, Student	163	50	18.8189	No	1	1	1	0	1	1	0	0	5	0	0	0	0	5	60	960	0	0	990	990	2	1	2	2	3	3	2	3	1	2	2	23	3	2	1	0	1	3	2
31	Episodic	visual	49	F	College	Active, Student	165	62	22.7732	No	1	1	1	1	1	1	0	0	6	5	45	4	30	7	120	300	1800	480	2772	5052	2	1	1	1	1	1	1	2	1	1	1	13	0	0	0	0	0	0	0
32	Episodic	visual	21	M	College	Active	178	68	21.4619	No	1	0	1	0	0	1	0	0	3	3	90	4	180	7	30	210	2160	2880	693	5733	2	3	1	2	1	3	3	1	1	1	3	21	2	1	0	0	1	2	0
33	Chronic	visual/motor	62	F	College	Retired	152	64	27.7008	Tensional headache	1	1	1	1	1	1	1	1	8	0	0	0	0	2	35	420	0	0	231	231	1	4	1	1	1	1	1	3	1	1	3	18	1	2	0	1	0	2	0
34	Episodic	visual	30	F	College	Active, Student	162	55	20.9572	No	1	1	1	1	1	1	0	0	6	0	0	0	0	5	30	600	0	0	495	495	1	1	1	1	1	1	1	1	1	1	1	11	1	0	0	0	0	0	0
35	Chronic	visual	55	F	Secondary	Active, Unemployed	158	58	23.2335	Tensional headache	1	1	1	1	1	1	1	1	8	0	0	0	0	5	20	300	0	0	330	330	1	3	4	4	1	2	3	3	1	3	1	26	1	1	2	2	2	1	1
36	Episodic	w/o	61	F	College	Unemployed	157	66	26.7759	No	1	1	1	1	1	1	1	1	8	0	0	5	30	4	30	420	0	600	396	996	1	1	1	1	1	1	1	1	1	1	1	11	0	2	0	0	1	2	0
37	Chronic	visual	28	F	College	Active	155	68	28.3039	Tensional headache	1	1	1	1	1	1	0	1	7	1	30	1	30	7	30	600	240	120	693	1053	1	3	1	1	1	1	1	2	1	1	1	14	3	1	1	1	1	3	0
38	Episodic	w/o	44	F	College	Active	172	72	24.3375	Tensional headache	0	0	0	0	0	0	0	0	0	0	0	3	60	2	60	540	0	720	396	1116	1	2	2	3	1	1	1	1	1	1	1	15	0	0	0	0	0	0	0
39	Episodic	motor	30	F	College	Active	167	55	19.721	No	1	1	1	1	1	1	1	0	7	4	60	1	60	7	30	300	1920	240	693	2853	1	3	1	2	1	3	3	3	1	1	1	20	2	0	0	0	0	2	0
40	Chronic	visual/motor	32	F	College	Active	169	65	22.7583	No	1	1	1	1	1	1	1	1	8	3	60	2	60	5	45	570	1440	480	742.5	2662.5	2	3	2	3	2	3	2	3	1	1	2	24	2	3	3	3	3	3	1
41	Episodic	visual	41	F	College	Active	169	84	29.4107	No	1	1	1	1	1	1	0	1	7	4	75	1	70	6	60	240	2400	280	1188	3868	2	2	1	2	2	1	2	2	1	1	1	17	3	2	0	0	0	3	0
42	Chronic	visual/motor	31	F	College	Active	162	55	20.9572	No	1	1	1	1	1	1	1	0	7	0	0	0	0	7	90	600	0	0	2079	2079	4	3	3	2	3	2	2	2	2	3	2	28	3	3	2	2	3	2	0
43	Chronic	visual	47	F	College	Active	171	80	27.3588	No	1	1	1	1	1	1	0	0	6	1	60	0	0	7	30	480	480	0	693	1173	3	2	2	3	3	2	3	3	1	1	1	24	0	0	0	0	0	1	0
44	Chronic	w/o	43	F	College	Active	162	65	24.7676	No	1	1	1	1	1	1	1	1	8	0	0	0	0	4	15	300	0	0	198	198	4	4	4	2	4	4	4	4	2	4	2	38	3	4	4	4	4	0	1
45	Chronic	visual/motor	30	F	College	Active	166	80	29.0318	No	1	1	1	1	1	1	1	1	8	3	20	3	30	7	25	600	480	360	577.5	1417.5	3	4	3	4	3	1	4	4	1	3	3	33	2	2	4	2	3	3	0
46	Chronic	visual/motor	43	M	College	Active	173	105	35.083	No	1	1	1	1	1	1	1	1	8	0	0	0	0	5	30	720	0	0	495	495	1	1	3	3	1	4	2	4	2	1	3	25	2	0	1	0	1	2	0
47	Episodic	visual	34	F	College	Active, Unemployed	172	65	21.9713	No	1	1	1	1	1	1	0	1	7	4	60	1	60	7	60	360	1920	240	1386	3546	1	1	3	3	1	4	4	4	1	1	3	26	3	2	0	0	1	0	3
48	Episodic	visual	45	F	College	Active	161	90	34.7209	No	1	1	1	1	1	1	0	0	6	0	0	4	60	7	120	20	0	960	2772	3732	1	3	3	3	3	3	2	3	2	2	4	29	0	0	0	0	0	1	0
49	Episodic	w/o	46	F	College	Active	158	70	28.0404	No	1	1	1	1	1	0	0	1	6	0	0	2	60	0	0	120	0	480	0	480	1	1	1	1	1	1	1	2	1	1	1	12	3	2	3	3	2	3	2
50	Episodic	visual/motor	42	F	College	Active, Student	168	60	21.2585	No	1	1	1	1	1	1	1	1	8	0	0	2	120	7	60	240	0	960	1386	2346	3	2	2	3	3	2	2	2	2	2	3	26	2	2	3	3	2	2	2
51	Chronic	visual/motor	23	F	College	Active	158	46	18.4265	No	1	1	1	1	1	1	1	1	8	1	45	2	45	7	30	300	360	360	693	1413	1	1	2	1	2	1	1	2	1	1	1	14	2	3	3	3	2	3	1
52	Episodic	motor	37	F	College	Active	169	65	22.7583	Tensional headache	0	0	0	0	0	0	0	0	0	0	0	2	90	4	60	540	0	720	792	1512	2	4	4	4	2	3	4	2	1	1	2	29	3	3	3	3	2	3	0
53	Chronic	visual	54	F	College	Active, Unemployed	157	78	31.6443	No	0	1	1	0	1	1	0	0	4	0	0	0	0	7	60	360	0	0	1386	1386	3	1	1	4	4	4	1	3	1	2	1	25	4	4	4	4	4	4	0
54	Episodic	w/o	25	F	College	Active, Student	165	63	23.1405	No	1	1	1	0	1	0	0	0	4	0	0	0	0	2	30	210	0	0	198	198	1	1	1	2	1	1	1	1	1	1	2	13	2	2	1	0	3	1	0
55	Episodic	w/o	27	M	College	Student	170	112	38.7543	Tensional headache	0	1	1	0	1	1	0	0	4	0	0	2	90	7	60	480	0	720	1386	2106	3	2	1	3	1	2	1	3	1	1	3	21	2	1	0	0	0	2	1
56	Episodic	w/o	31	F	College	Active, Student	160	52	20.3125	No	1	0	1	1	1	1	0	0	5	0	0	0	90	7	180	600	0	0	4158	4158	1	4	2	3	1	1	1	3	1	1	2	20	0	0	0	0	0	1	0
57	Chronic	visual/motor	25	F	College	Active, Student	162	54	20.5761	No	1	1	1	0	1	1	1	1	7	4	75	3	45	7	90	360	2400	540	2079	5019	1	1	3	1	1	1	1	3	1	1	1	15	0	0	0	0	0	0	0
58	Chronic	visual/motor	58	F	College	Active	158	57	22.8329	Tensional headache	1	1	1	1	1	0	0	0	5	6	30	0	0	7	100	360	1440	0	2310	3750	3	1	4	1	3	4	4	3	1	1	1	26	2	3	0	1	1	2	0
59	Episodic	visual	36	F	College	Active	178	86	27.143	No	1	1	1	1	1	1	0	0	6	4	60	0	0	4	30	480	1920	0	396	2316	4	4	3	4	3	4	2	3	1	2	2	32	3	3	2	3	3	3	1
60	Chronic	visual	62	F	College	Active	168	73	25.8645	No	1	1	1	1	1	1	1	1	8	2	60	0	0	7	35	360	960	0	808.5	1768.5	1	4	1	2	1	3	1	4	1	1	1	20	1	0	0	0	0	0	0
61	Episodic	visual	43	F	Secondary	Active	167	60	21.5139	No	1	1	1	0	1	1	0	0	5	0	0	6	60	7	7	500	0	1440	161.7	1601.7	1	3	3	3	1	4	3	3	1	1	2	25	0	0	0	0	0	0	0
62	Episodic	visual/motor	64	F	College	Active	165	79	29.0174	No	1	1	1	1	1	1	1	1	8	0	0	0	0	5	60	480	0	0	990	990	1	1	3	2	1	2	2	3	1	2	2	20	1	1	1	2	1	2	2
63	Chronic	visual/motor	42	F	College	Active	168	66	23.3844	No	1	1	1	1	1	1	0	1	7	0	0	0	0	4	20	500	0	0	264	264	3	3	3	3	3	4	2	2	3	3	2	31	4	4	3	4	4	4	3
64	Episodic	visual	24	M	College	Active, Student	177	75	23.9395	No	1	1	1	0	1	1	0	0	5	2	60	0	0	7	20	600	960	0	462	1422	1	3	3	2	1	2	2	3	1	1	1	20	0	2	1	1	2	2	0
65	Episodic	w/o	55	F	College	Active	167	82	29.4023	No	1	1	1	1	1	1	0	1	7	0	0	0	0	3	60	480	0	0	594	594	4	1	1	2	3	1	2	4	1	1	1	21	2	1	0	0	0	1	1
66	Episodic	motor	18	F	College	Student	163	56	21.0772	No	1	1	1	0	1	1	0	1	6	0	0	7	35	7	10	120	0	980	231	1211	3	2	2	2	3	3	2	3	2	2	3	27	2	2	2	1	3	3	0
67	Chronic	w/o	31	F	College	Active	164	54	20.0773	Tensional headache	1	1	1	1	1	1	0	0	6	0	0	0	0	5	20	4	0	0	330	330	3	1	1	2	1	1	1	1	1	1	1	14	1	0	0	0	0	1	0
68	Episodic	w/o	25	M	College	Unemployed	183	92	27.4717	No	1	1	1	1	1	0	0	0	5	4	90	4	20	5	40	600	2880	320	660	3860	3	4	2	2	3	4	3	4	1	4	2	32	2	0	2	0	0	3	0
69	Episodic	motor	18	M	College	Student	180	78	24.0741	No	1	1	1	0	1	1	0	0	5	3	90	0	0	7	40	480	2160	0	924	3084	2	1	1	1	1	3	1	2	1	2	3	18	4	2	0	3	3	3	4
70	Episodic	w/o	43	F	College	Active	169	94	32.912	No	0	0	0	0	0	0	0	0	0	6	20	1	60	7	30	480	960	240	693	1893	1	4	4	4	1	3	3	4	1	1	1	27	0	0	2	2	2	1	2
71	Episodic	visual	47	F	Primary	Active	164	64	23.7954	No	1	1	1	0	0	1	0	0	4	0	0	3	50	7	150	150	0	600	3465	4065	2	4	3	1	2	4	2	4	1	1	1	25	4	2	1	0	2	3	0
72	Chronic	visual	24	F	College	Active, Student	167	65	23.3067	No	1	1	1	1	1	1	0	0	6	4	60	0	7	7	60	120	1920	0	1386	3306	2	2	3	1	1	1	1	2	1	1	1	16	3	3	4	3	3	3	0
73	Episodic	visual	28	F	College	Active, Student	161	65	25.0762	No	1	1	1	0	1	1	0	0	5	2	45	3	90	7	90	240	720	1080	2079	3879	1	2	1	1	2	1	1	2	2	1	1	15	1	0	0	0	0	2	0
74	Episodic	visual	45	F	College	Active	169	63	22.0581	No	1	1	1	0	1	1	0	0	5	5	60	1	30	7	70	500	2400	120	1617	4137	1	1	2	1	1	1	1	1	1	1	1	12	0	1	0	0	2	3	0
75	Chronic	visual/motor	49	F	College	Active	170	85	29.4118	Tensional headache	1	1	1	1	1	1	0	0	6	4	45	6	120	7	45	300	1440	2880	1039.5	5359.5	1	4	1	1	1	1	1	1	1	1	1	14	0	0	0	0	0	1	0
76	Episodic	visual	53	F	Primary	Active, Student	169	74	25.9095	No	1	1	1	0	1	1	0	0	5	0	0	0	0	1	30	300	0	0	99	99	4	4	4	4	4	4	4	4	2	2	2	38	1	0	0	0	0	0	0
77	Chronic	w/o	51	F	College	Active	178	70	22.0932	No	1	1	1	0	1	1	0	0	5	2	60	0	0	7	30	480	960	0	693	1653	3	1	1	3	3	3	2	4	1	1	2	24	3	2	4	2	1	0	0
78	Chronic	visual/motor	21	F	College	Student	170	79	27.3356	No	1	1	1	0	1	1	1	0	6	5	150	4	60	7	30	240	6000	960	693	7653	1	1	1	1	2	3	2	2	1	1	3	18	2	1	0	0	0	1	0
79	Chronic	visual	39	F	College	Retired	158	72	28.8415	Tensional headache	1	1	1	1	1	1	0	1	7	0	0	1	50	6	20	600	0	200	396	596	1	1	3	3	1	4	3	4	2	3	3	28	3	4	4	4	4	4	0
80	Chronic	w/o	50	F	College	Active	165	75	27.5482	No	1	1	1	1	1	1	0	1	7	1	50	4	30	7	35	600	400	480	808.5	1688.5	2	1	3	3	1	3	3	4	1	3	2	26	3	4	3	3	4	3	1
81	Chronic	visual	45	F	College	Active	171	55	18.8092	No	1	1	1	1	1	1	0	0	6	0	0	7	60	7	40	600	0	1680	924	2604	1	3	3	1	1	3	1	3	2	1	2	21	4	2	1	0	0	3	0
82	Episodic	w/o	63	M	College	Active	170	78	26.9896	No	1	1	1	0	1	1	1	0	6	0	0	5	120	7	120	240	0	2400	2772	5172	1	1	1	4	1	1	1	1	1	1	1	14	3	3	0	0	0	3	0
83	Episodic	w/o	34	F	College	Active	160	50	19.5312	No	0	1	1	1	1	1	0	0	5	0	0	0	0	7	60	480	0	0	1386	1386	3	3	2	2	3	3	2	3	2	2	2	27	3	3	3	3	2	4	1
84	Chronic	visual/motor	34	F	College	Active, Unemployed	164	57	21.1927	No	1	1	1	1	1	1	0	0	6	0	0	7	45	7	90	450	0	1260	2079	3339	3	3	2	2	2	2	2	2	2	2	1	23	1	0	2	2	1	3	0
85	Episodic	visual	27	F	College	Active	150	53	23.5556	No	1	1	1	0	1	1	1	1	7	3	90	1	90	7	25	600	2160	360	577.5	3097.5	3	3	2	1	3	4	1	4	1	2	2	26	2	2	0	1	0	3	2
86	Chronic	visual	28	F	College	Active	173	73	24.3911	No	1	1	1	1	1	1	0	0	6	5	60	4	60	7	90	210	2400	960	2079	5439	3	3	3	2	3	2	3	4	1	2	2	28	2	2	3	3	3	3	2
87	Chronic	w/o	31	F	College	Active	165	70	25.7117	No	1	1	1	1	1	1	0	0	6	0	0	2	120	5	180	720	0	960	2970	3930	3	3	4	2	3	3	3	4	1	1	3	30	2	3	1	1	1	2	1
88	Episodic	visual	28	F	College	Active	170	66	22.8374	No	1	1	1	1	1	1	1	1	8	0	0	4	360	7	120	720	0	5760	2772	8532	1	1	2	2	2	4	1	3	1	1	3	21	2	2	3	3	2	4	0
89	Chronic	w/o	47	M	Primary	Active	175	83	27.102	No	0	0	0	0	0	0	0	0	0	2	120	3	180	7	140	300	1920	2160	3234	7314	1	1	1	1	1	2	1	2	1	1	1	13	0	0	0	0	0	2	0
90	Episodic	visual	46	F	College	Active	165	70	25.7117	No	1	1	1	1	1	1	0	0	6	4	60	3	60	7	30	180	1920	720	693	3333	2	2	1	2	1	2	2	2	1	2	3	20	2	0	0	0	0	2	0
91	Chronic	w/o	33	M	College	Active	180	71	21.9136	No	0	0	1	1	1	1	0	0	4	0	0	0	0	7	20	300	0	0	462	462	1	3	4	1	1	1	3	2	2	1	1	20	3	3	4	2	3	4	3
92	Chronic	visual/motor	27	F	College	Active	169	68	23.8087	Tensional headache	1	1	1	1	1	1	0	1	7	1	20	1	20	3	25	600	160	80	247.5	487.5	1	2	2	1	1	2	2	1	1	1	2	16	1	1	1	1	1	1	0
93	Episodic	visual/motor	29	F	College	Active, Student	166	62	22.4996	No	1	1	1	0	0	1	0	0	4	0	0	0	0	5	45	540	0	0	742.5	742.5	1	1	3	2	1	1	1	2	1	1	1	15	2	1	0	0	2	3	0
94	Chronic	w/o	61	M	Secondary	Retired	183	89	26.5759	Tensional headache	0	0	0	0	0	0	0	0	0	0	0	7	90	7	40	360	0	2520	924	3444	3	3	3	2	1	4	2	3	1	1	1	24	1	1	0	1	0	0	0
95	Chronic	w/o	28	F	College	Active, Student	165	56	20.5693	No	1	1	1	0	1	1	0	0	5	3	90	2	60	7	20	240	2160	480	462	3102	2	2	3	2	2	3	2	3	1	1	2	23	1	3	2	2	2	1	1
96	Chronic	visual	23	F	College	Student	162	65	24.7676	No	1	0	1	0	1	1	1	0	5	4	80	5	120	7	90	60	2560	2400	2079	7039	1	1	1	2	1	4	1	2	1	1	1	16	0	0	1	0	1	1	0
97	Chronic	w/o	29	F	College	Active	170	63	21.7993	No	1	1	1	0	1	1	0	0	5	3	80	5	60	3	60	120	1920	1200	594	3714	3	4	2	1	3	1	3	3	1	3	2	26	1	2	2	1	1	1	0
98	Chronic	visual	40	F	Secondary	Active	165	64	23.5078	No	1	1	1	0	1	1	0	0	5	5	60	5	240	6	40	90	2400	4800	792	7992	1	4	1	1	1	4	1	4	1	3	1	22	3	3	3	3	4	1	2
99	Episodic	visual	33	M	College	Active	188	105	29.708	No	1	1	1	0	1	1	0	0	5	3	120	3	120	5	180	420	2880	1440	2970	7290	2	3	3	4	1	2	3	2	1	1	2	24	0	0	0	0	0	1	0
100	Chronic	visual/motor	39	F	College	Active	160	62	24.2187	Trigeminal autonomic cephalalgias	1	1	1	0	1	1	0	1	6	0	0	0	0	5	60	600	0	0	990	990	3	4	4	2	3	3	3	3	2	4	1	32	3	4	4	4	3	4	4
101	Episodic	visual	39	M	Secondary	Active	178	89	28.0899	No	1	0	1	1	1	0	0	0	4	0	0	4	30	6	40	240	0	480	792	1272	3	4	2	4	3	3	2	4	1	1	3	30	0	0	0	0	0	2	0
102	Chronic	visual/motor	40	M	College	Active, Student	178	90	28.4055	No	1	1	1	0	1	0	0	0	4	3	60	3	60	7	40	240	1440	720	924	3084	1	1	3	1	1	1	2	1	1	1	1	14	0	1	0	0	0	1	0
103	Episodic	visual/motor	24	F	College	Active, Student	172	63	21.2953	No	1	1	1	1	1	1	1	1	8	4	90	3	60	7	40	360	2880	720	924	4524	1	1	1	1	1	4	1	4	1	1	1	17	1	2	2	2	2	3	1
104	Chronic	vestibular	50	F	College	Active, Unemployed	160	59	23.0469	No	1	1	0	0	1	0	0	1	4	3	60	0	30	3	60	15	1440	0	594	2034	4	4	1	1	4	1	1	3	1	1	1	22	3	3	2	1	0	2	0
105	Chronic	w/o	25	F	College	Active	155	50	20.8117	No	1	1	1	1	1	1	0	0	6	2	120	2	60	7	90	240	1920	480	2079	4479	3	2	3	3	2	2	2	2	1	1	1	22	0	0	0	0	0	1	3
106	Episodic	w/o	24	F	College	Active, Student	158	53	21.2306	No	1	1	1	0	1	1	0	0	5	3	60	2	30	7	45	180	1440	240	1039.5	2719.5	3	1	2	3	1	2	2	3	1	1	1	20	2	1	0	0	0	2	1
107	Episodic	visual	46	F	Secondary	Active	156	72	29.5858	No	1	1	1	1	1	1	0	0	6	0	0	0	0	2	30	2535	0	0	198	198	1	3	3	3	1	1	1	4	1	1	4	23	3	0	0	0	0	1	1
108	Chronic	motor	31	F	Secondary	Active	171	75	25.6489	No	1	1	1	1	1	1	0	0	6	2	40	0	0	6	30	480	640	0	594	1234	3	3	2	2	2	3	3	2	1	2	2	25	2	3	4	3	3	3	3
109	Episodic	visual	25	F	College	Active	174	73	24.1115	Tensional headache	1	1	1	0	1	1	1	1	7	0	0	0	0	7	30	600	0	0	693	693	1	4	1	1	1	4	1	3	1	1	3	21	2	3	2	1	2	1	0
110	Chronic	visual	24	F	College	Student	156	46	18.902	No	1	1	1	0	1	1	0	0	5	2	90	2	90	7	60	180	1440	720	1386	3546	1	1	2	3	1	1	2	2	1	3	1	18	3	2	2	0	1	2	0
[truncated: 92 more columns]
